# Supplementary material
Source: bioRxiv or medRxiv preprint supplement (https://www.biorxiv.org/highwire/filestream/93045/field_highwire_adjunct_files/3/302604-4.pdf)
Supplement: Supplementary file [file 302604-4.pdf]

**Supplemental Table 3:** The mean expression of the genes in the red, green, and blue groups from all 75 analyzed mouse strains. The strains are organized by descending average of green genes. See Fig. 3a, Supplemental Fig. 5.

| Strain      | Red  | Green | Blue | Strain         | Red  | Green | Blue |
|-------------|------|-------|------|----------------|------|-------|------|
| AXB19/PgnJ  | 4.05 | 8.33  | 5.99 | BXD31/TyJ      | 4.21 | 7.82  | 6.22 |
| BXD6/TyJ    | 5.09 | 8.29  | 5.84 | BXD19/TyJ      | 4.68 | 7.80  | 6.13 |
| BXD21/TyJ   | 5.08 | 8.28  | 5.83 | AXB23/PgnJ     | 4.50 | 7.78  | 6.27 |
| AXB13/PgnJ  | 4.05 | 8.25  | 6.02 | BXD38/TyJ      | 4.03 | 7.76  | 6.17 |
| AXB19a/PgnJ | 4.70 | 8.24  | 6.01 | BXA12/PgnJ     | 4.09 | 7.75  | 6.22 |
| BXA24/PgnJ  | 4.39 | 8.22  | 6.13 | BXD9/TyJ       | 5.02 | 7.72  | 6.01 |
| AXB24/PgnJ  | 4.42 | 8.21  | 5.91 | BXD42/TyJ      | 4.08 | 7.70  | 6.15 |
| BXA2/PgnJ   | 4.60 | 8.18  | 5.99 | C58/J          | 4.40 | 7.69  | 6.24 |
| BXD33/TyJ   | 5.18 | 8.17  | 5.92 | BALB/cJ        | 4.74 | 7.61  | 6.40 |
| SM/J        | 4.94 | 8.16  | 6.07 | BXD22/TyJ      | 4.37 | 7.53  | 6.16 |
| C57BL/6J    | 4.06 | 8.14  | 6.00 | MA/MyJ         | 4.35 | 7.50  | 6.47 |
| AXB4/PgnJ   | 3.97 | 8.14  | 6.14 | C57L/J         | 4.73 | 7.47  | 6.36 |
| BXA7/PgnJ   | 4.35 | 8.14  | 5.95 | BTBR T<+> tf/J | 4.73 | 7.47  | 6.53 |
| AXB10/PgnJ  | 4.20 | 8.11  | 6.15 | PL/J           | 4.41 | 7.45  | 6.42 |
| BXA26/PgnJ  | 4.36 | 8.10  | 6.06 | BXH19/TyJ      | 3.96 | 7.36  | 6.52 |
| AXB12/PgnJ  | 5.13 | 8.09  | 6.00 | NZW/LacJ       | 5.48 | 7.33  | 6.50 |
| BXD5/TyJ    | 4.45 | 8.08  | 5.95 | AKR/J          | 4.82 | 7.23  | 6.45 |
| AXB1/PgnJ   | 4.03 | 8.05  | 5.99 | SEA/GnJ        | 5.80 | 7.20  | 6.43 |
| BXD2/TyJ    | 4.96 | 8.03  | 6.02 | SWR/J          | 4.07 | 7.16  | 6.57 |
| BXD20/TyJ   | 5.12 | 8.02  | 5.99 | CBA/J          | 4.61 | 7.01  | 6.65 |
| AXB2/PgnJ   | 4.14 | 8.01  | 6.08 | LG/J           | 5.51 | 6.91  | 6.59 |
| AXB15/PgnJ  | 5.17 | 8.01  | 6.00 | RIIIS/J        | 4.25 | 6.85  | 6.65 |
| BXD36/TyJ   | 4.58 | 8.00  | 5.99 | BXA8/PgnJ      | 4.73 | 6.83  | 6.68 |
| BXD27/TyJ   | 5.65 | 8.00  | 5.97 | BXH10/TyJ      | 5.17 | 6.73  | 6.68 |
| BXD28/TyJ   | 4.64 | 7.99  | 6.10 | BXH20/KccJ     | 4.73 | 6.70  | 6.75 |
| NOD/ShiLtJ  | 4.38 | 7.99  | 5.95 | BXH14/TyJ      | 4.96 | 6.56  | 6.88 |
| BXA14/PgnJ  | 5.54 | 7.98  | 5.99 | BXD29          | 4.74 | 6.30  | 6.95 |
| BXD32/TyJ   | 4.28 | 7.98  | 6.04 | BXH8/TyJ       | 4.80 | 6.10  | 7.15 |
| AXB8/PgnJ   | 5.02 | 7.98  | 5.99 | BUB/BnJ        | 6.14 | 6.06  | 6.99 |
| BXD39/TyJ   | 5.32 | 7.98  | 6.01 | BXH9/TyJ       | 4.52 | 5.97  | 7.18 |
| BXA1/PgnJ   | 4.14 | 7.97  | 6.17 | BXD1/TyJ       | 4.24 | 5.93  | 6.99 |
| BXD11/TyJ   | 4.47 | 7.95  | 6.00 | BXH22/KccJ     | 4.45 | 5.92  | 7.15 |
| BXD12/TyJ   | 4.81 | 7.95  | 6.08 | B6cC3          | 4.76 | 5.91  | 7.14 |
| BXD24/TyJ   | 5.00 | 7.94  | 5.96 | BXH7/TyJ       | 4.47 | 5.90  | 7.22 |
| BXD40/TyJ   | 4.31 | 7.93  | 5.98 | BXH2/TyJ       | 5.03 | 5.89  | 7.23 |
| BXD8/TyJ    | 4.62 | 7.90  | 6.10 | C3H/HeJ        | 4.41 | 5.89  | 7.28 |
| KK/HIJ      | 4.35 | 7.89  | 6.08 | BXH6/TyJ       | 4.37 | 5.79  | 7.31 |
| NON/ShiLtJ  | 4.48 | 7.82  | 6.27 |                |      |       |      |
